# Supplementary material for: New York City COVID-19 resident physician exposure during exponential phase of pandemic
Source: JCI journal article supplement (doi:10.1172/jci139587), 2020-05-28
Supplement: sd2 [file 2]

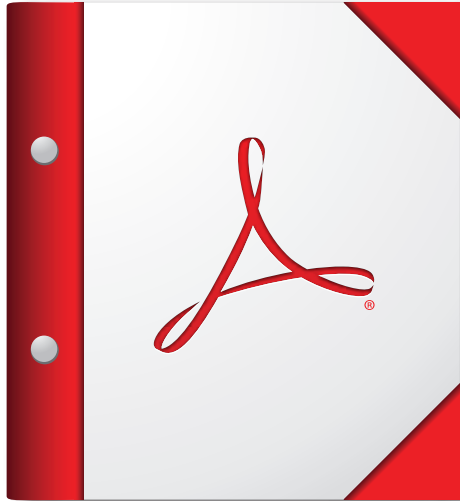

**For the best experience, open this PDF portfolio in  
Acrobat X or Adobe Reader X, or later.**

[Get Adobe Reader Now!](#)
